# Supplementary figures and images for: Growth of germanium on Au(111): formation of germanene or intermixing of Au and Ge atoms?
Source: Royal Society of Chemistry journal article supplement (doi:10.1039/c7cp02949g), 2017-01-01

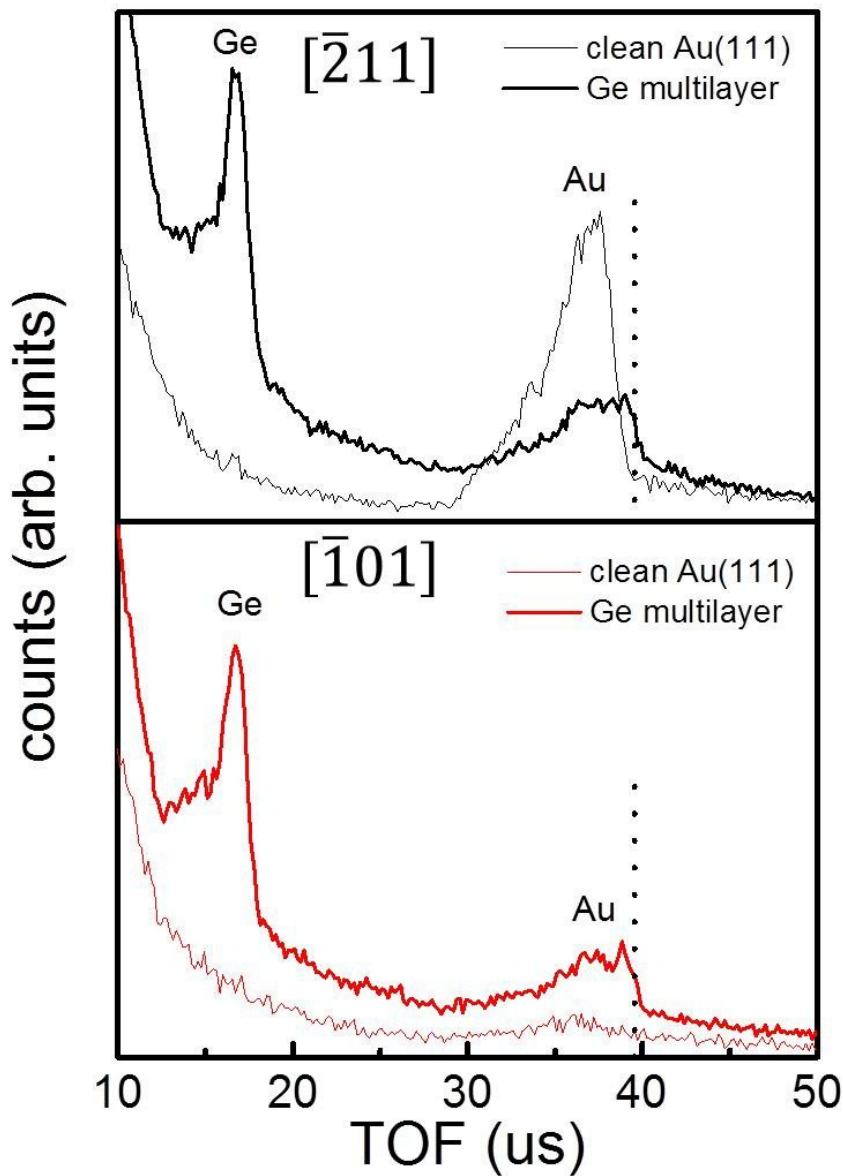

Supplement: c7cp02949g2.pdf [file c7cp02949g2.pdf]

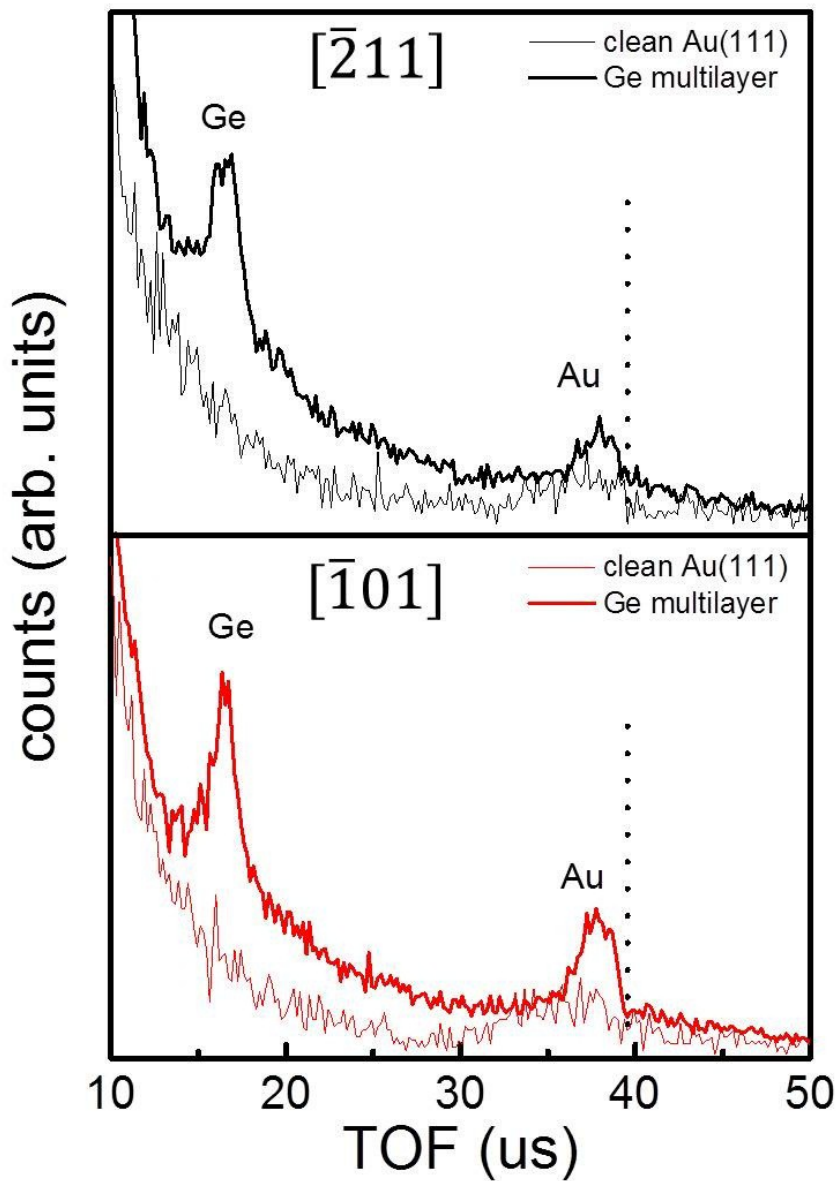

Supplement: c7cp02949g3.pdf [file c7cp02949g3.pdf]

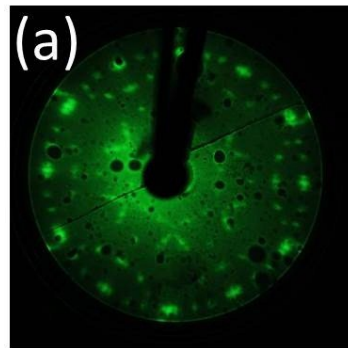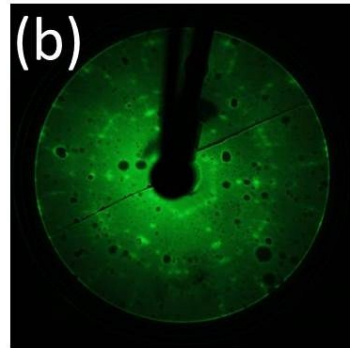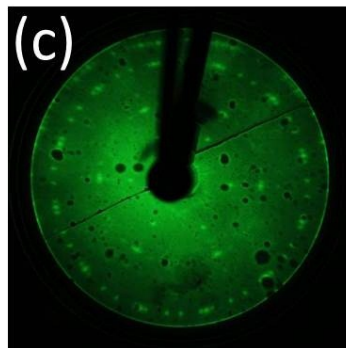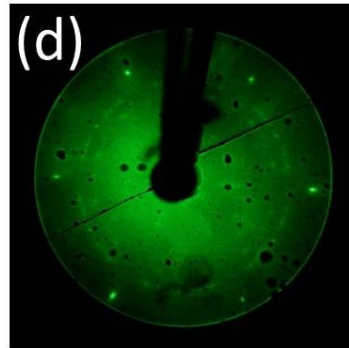

Supplement: c7cp02949g4.pdf [file c7cp02949g4.pdf]

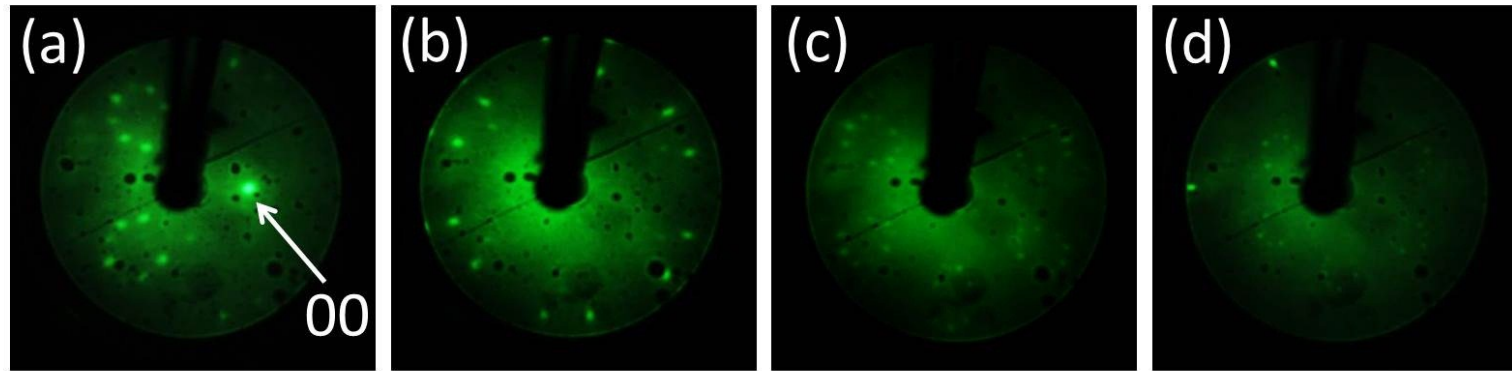

Supplement: c7cp02949g5.pdf [file c7cp02949g5.pdf]

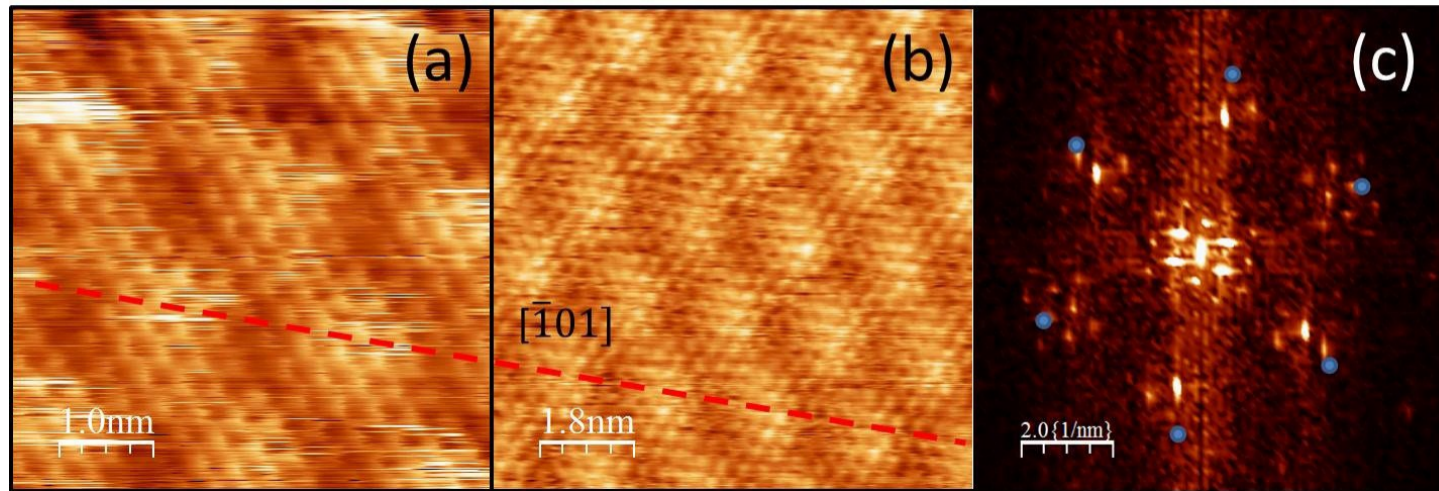

Supplement: c7cp02949g6.pdf [file c7cp02949g6.pdf]
